# Supplementary material
Source: PubMed Central journal article supplement (PMC5054346)
Supplement: 10.1074_M116.059709_mcp.M116.059709-1.pdf [file 10.1074_M116.059709_mcp.M116.059709-1.pdf]

Supplemental figures to

## **Specificity of protein covalent modification by the electrophilic proteasome inhibitor carfilzomib in human cells**

Joel D. Federspiel, Simona G. Codreanu, Sandeep Goyal, Matthew E. Albertolle, Eric Lowe, Juli Teague, Hansen Wong, F. Peter Guengerich, and Daniel C. Liebler

A

## Metabolic stability of CFZ and analogue compounds

| Compound (1 $\mu$ M) | P2 moiety                                                                           | % Remaining at 120 min | $T_{1/2}$ (min) | $CL_{int}$ (mL/min/kg) | $Cl_{hep}$ , predicted (mL/min/kg) |
|----------------------|-------------------------------------------------------------------------------------|------------------------|-----------------|------------------------|------------------------------------|
| OP-828               | 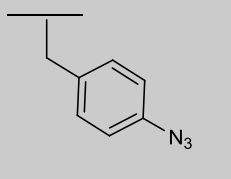   | 0.105                  | 7.34            | 437                    | 19.8                               |
| OP-829               |   | 0.740                  | 13.1            | 245                    | 19.1                               |
| OP-830               |  | 0.391                  | 11.4            | 280                    | 19.3                               |
| CFZ                  |  | 0.422                  | 8.51            | 377                    | 19.6                               |

Supplemental Figure 1. (A) Table of metabolic stability values for the parent carfilzomib compound and the three analogues. (B) MS/MS fragmentation of carfilzomib. (C) MS/MS fragmentation of OP-829.

B

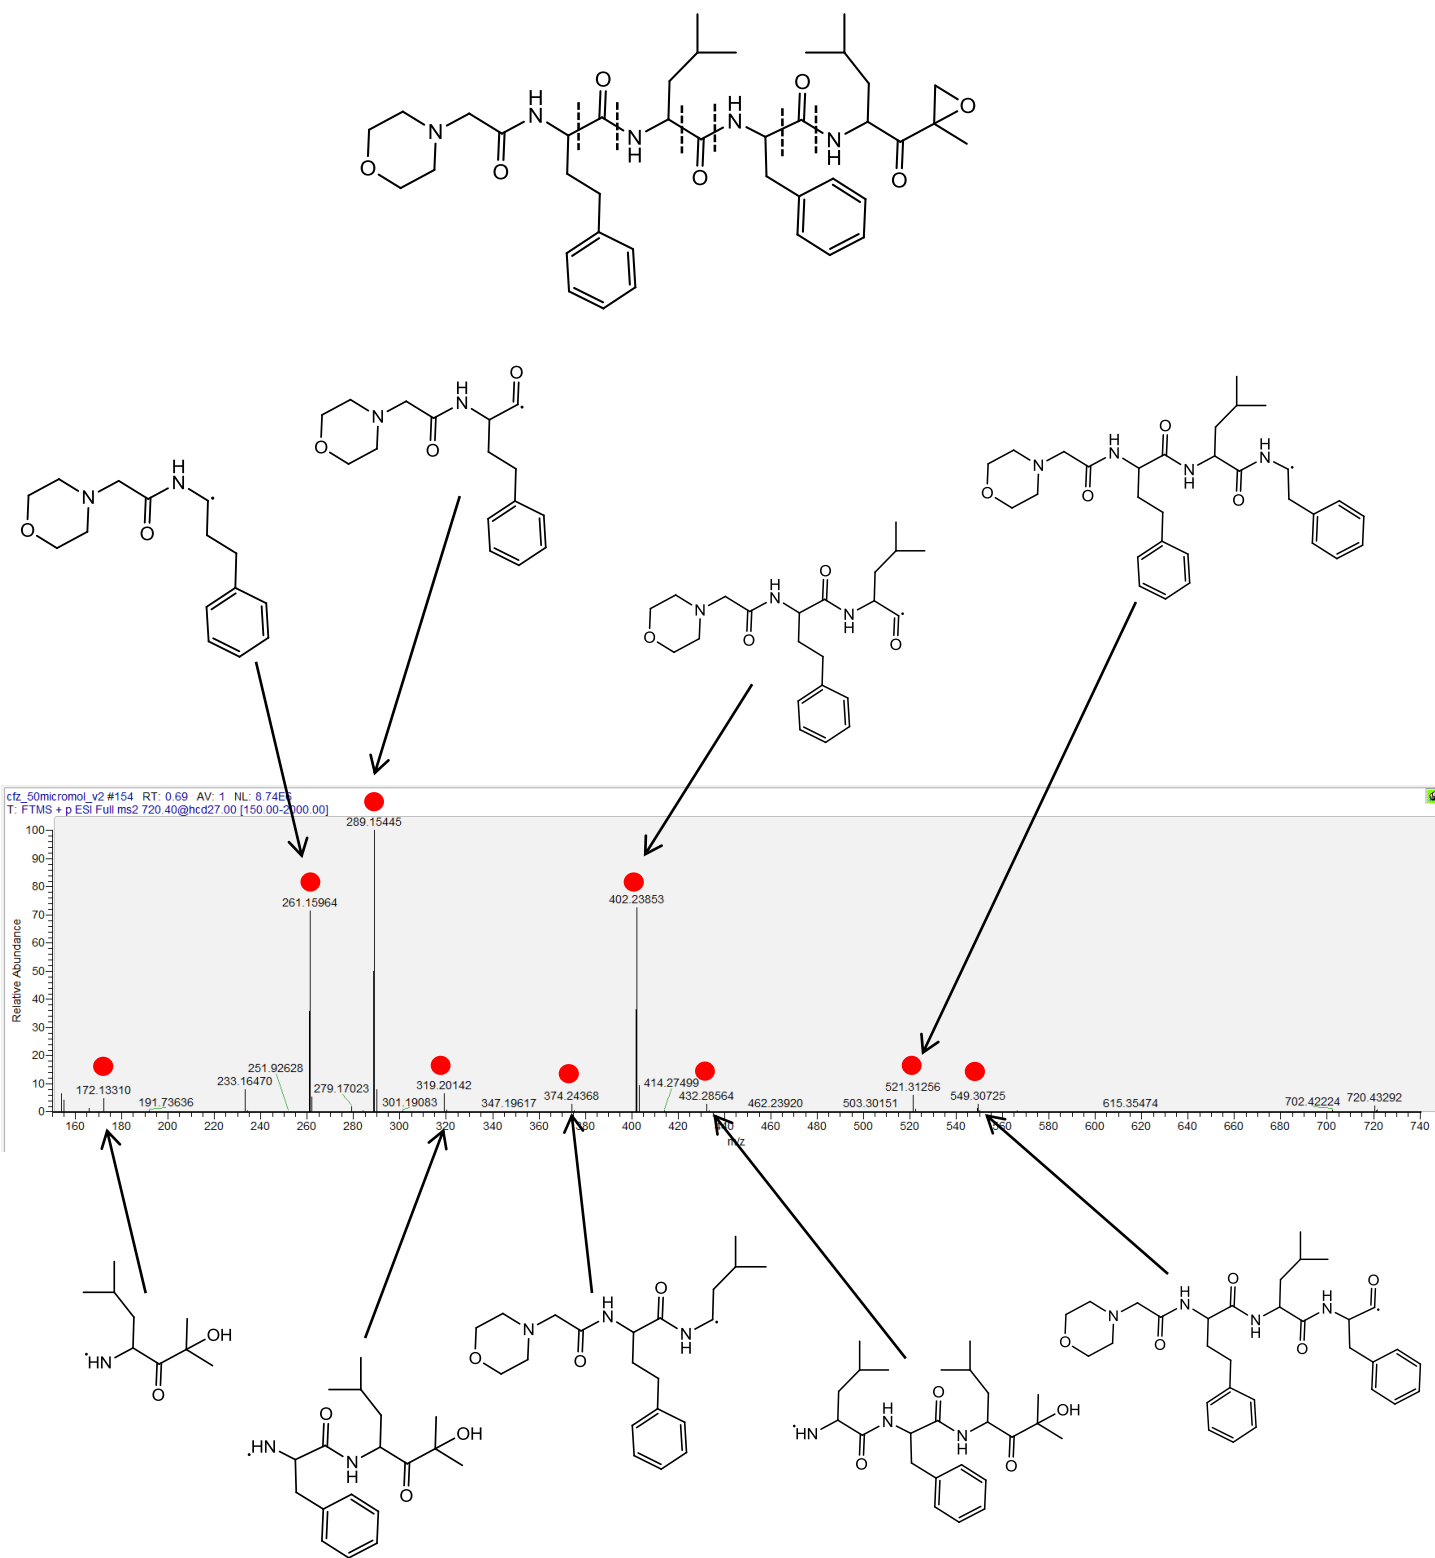

Supplemental Figure 1.

C

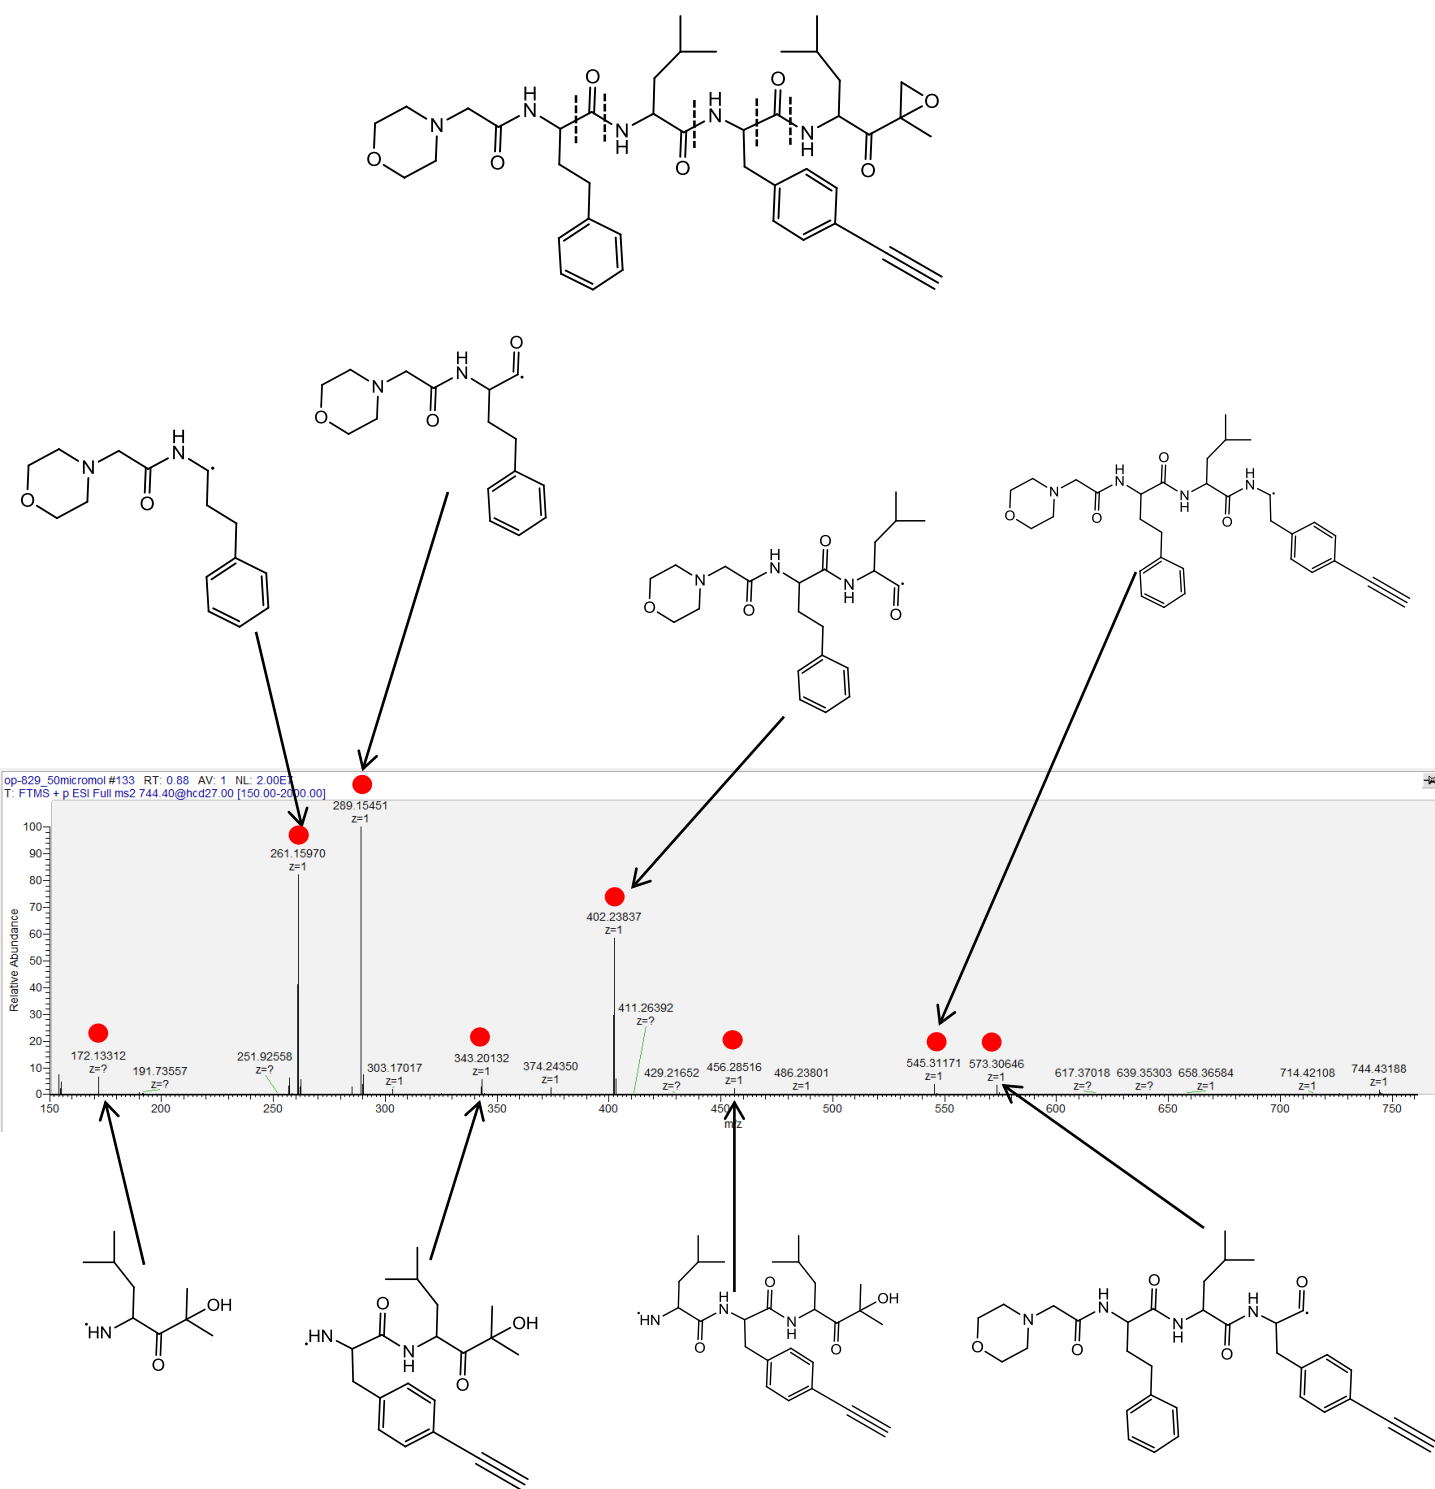

Supplemental Figure 1.

A

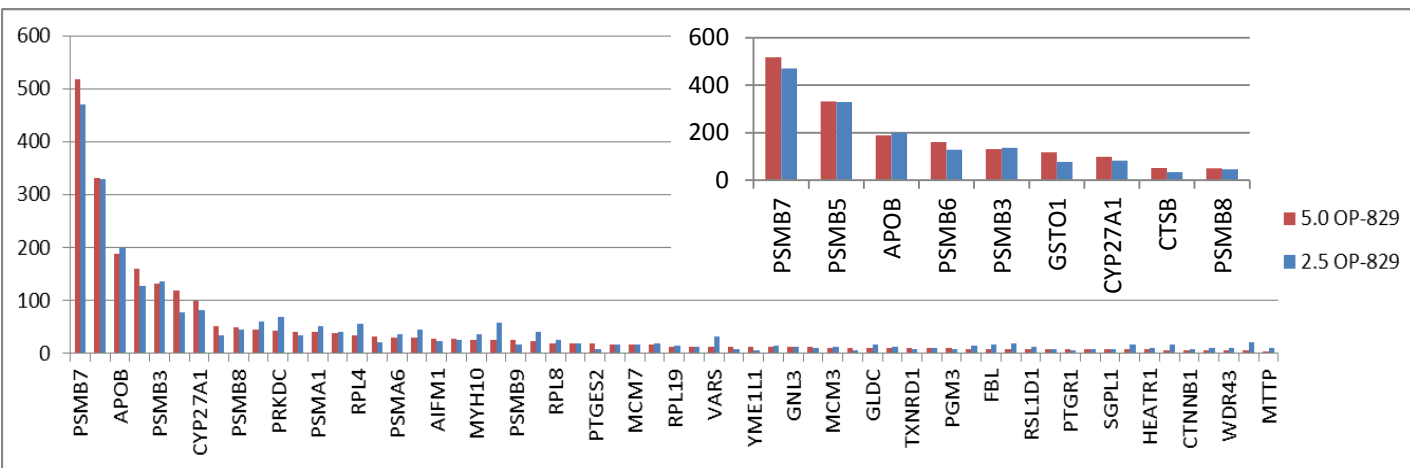

B

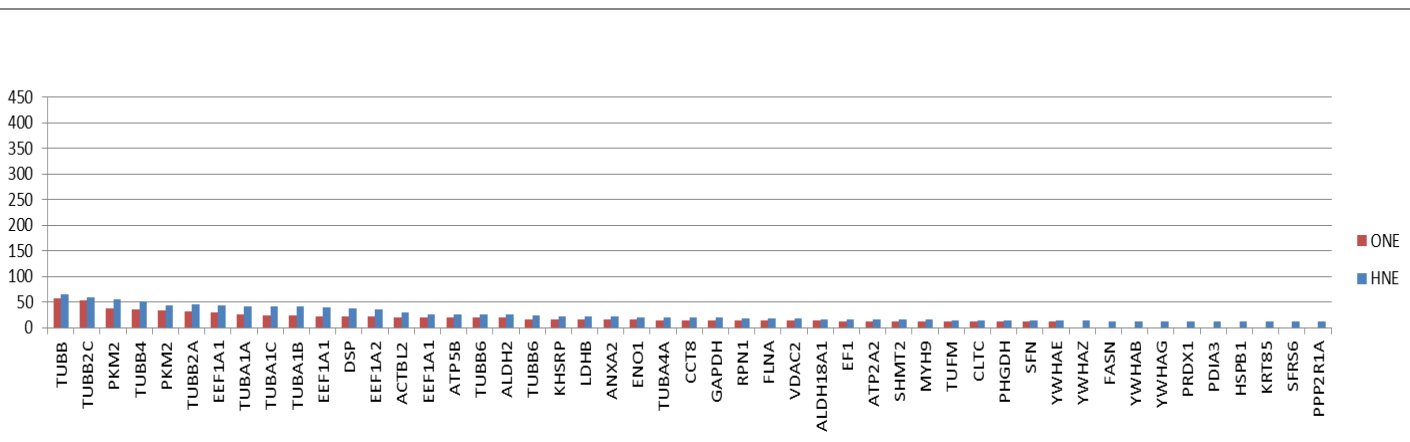

Supplemental Figure 2. Comparison of (A) OP-829 specificity to the relatively non-specific electrophiles (B) HNE and ONE at a 10 $\mu$ M concentration. Protein names are on the x-axis and spectral counts are on the y-axis. Proteins shown in (A) were enriched at least 4-fold in the OP-829 treatment over DMSO controls.

A

CYP27A1: <sup>474</sup>A**C[719]**LGR<sup>478</sup>

MS1

20140905M\_SC\_onyx\_CYP\_Try\_Third\_05 #28186 RT: 52.16 AV: 1 NL: 2.61E7  
T: FTMS + p NSI Full ms [380.00-1500.00]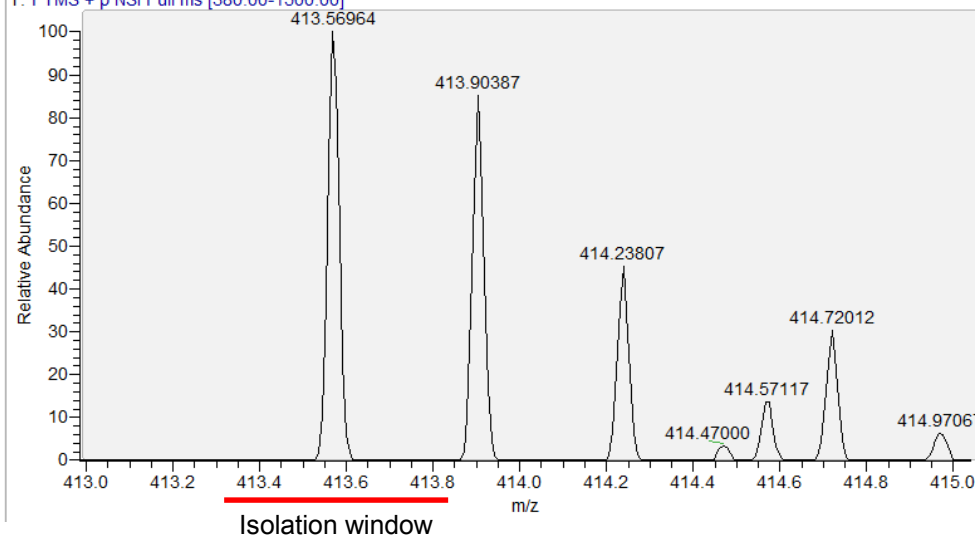

Precursor mass error:  
-0.91ppm

Evidence of adduct: CFZ  
fragment ions (red circles)  
and y<sub>4</sub><sup>+2</sup> ion showing mass  
shifted Cys residue

MS2

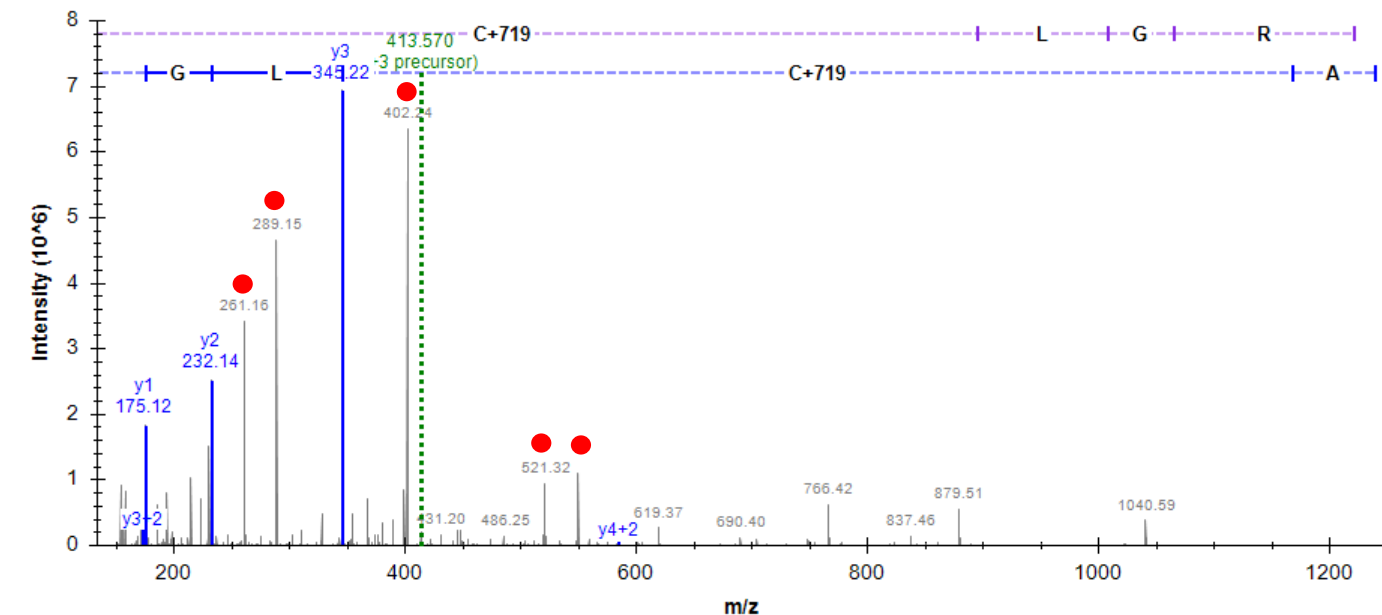

Supplemental Figure 3. MS/MS spectra of carfilzomib adducted peptides from (A) CYP27A1 and (B) GSTO1. Red circles denote fragment ions originating from the CFZ compound as in Fig S1B.

A

# CYP27A1: <sup>225</sup>I**G**C**[719]**LQR<sup>230</sup>

MS1

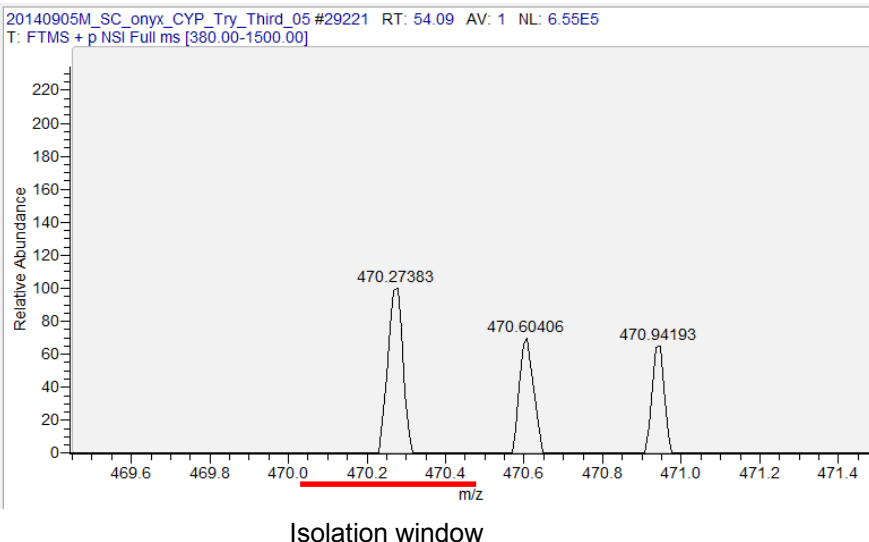

Precursor mass error:  
-4.71ppm

Evidence of adduct: CFZ  
fragment ions (red circles)  
and y5 ion showing mass  
shifted residues

MS2

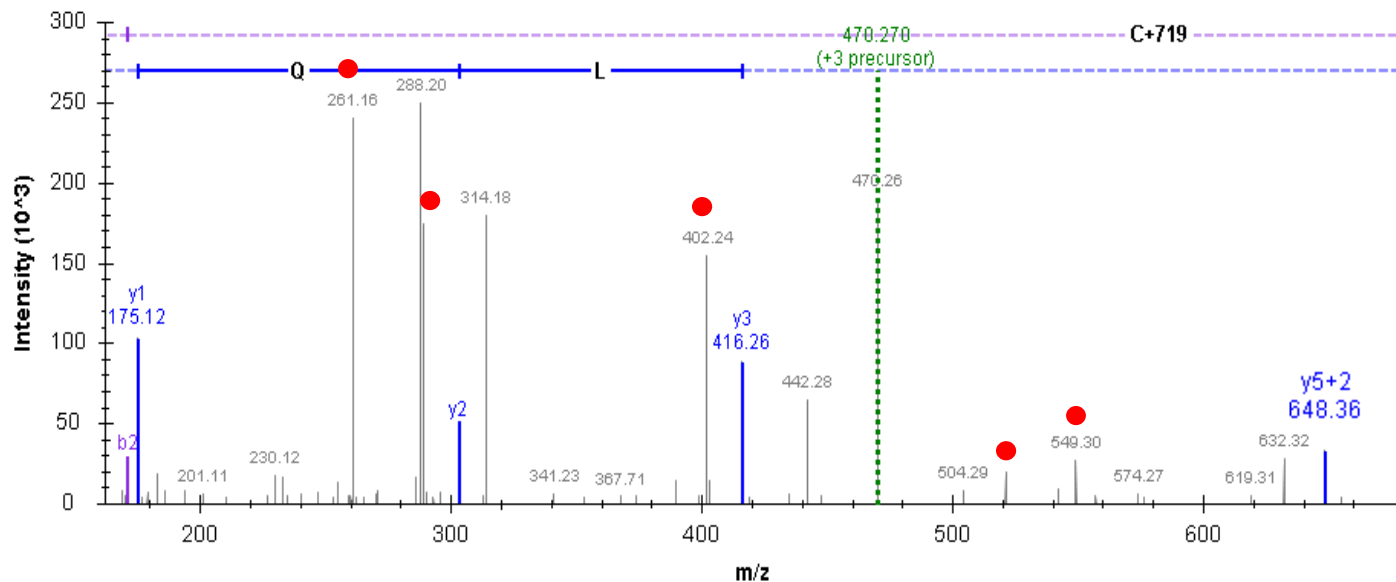

Supplemental Figure 3.

A

CYP27A1: <sup>420</sup>NTQFVFC[719]HYVVSR<sup>432</sup>

MS1

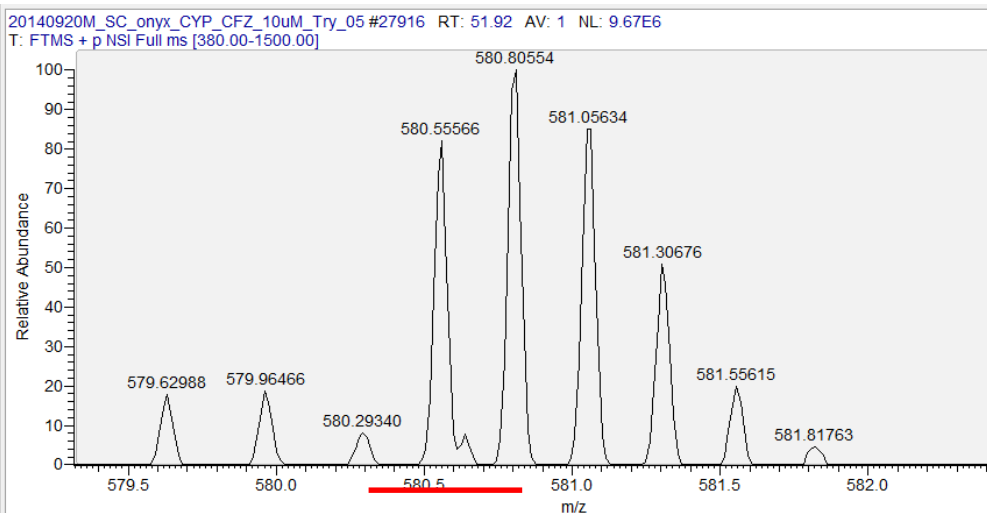

Precursor mass error:  
8.06ppm

Evidence of adduct: CFZ  
fragment ions (red circles)  
and y7 ion showing mass  
shifted Cys residue

Isolation window

MS2

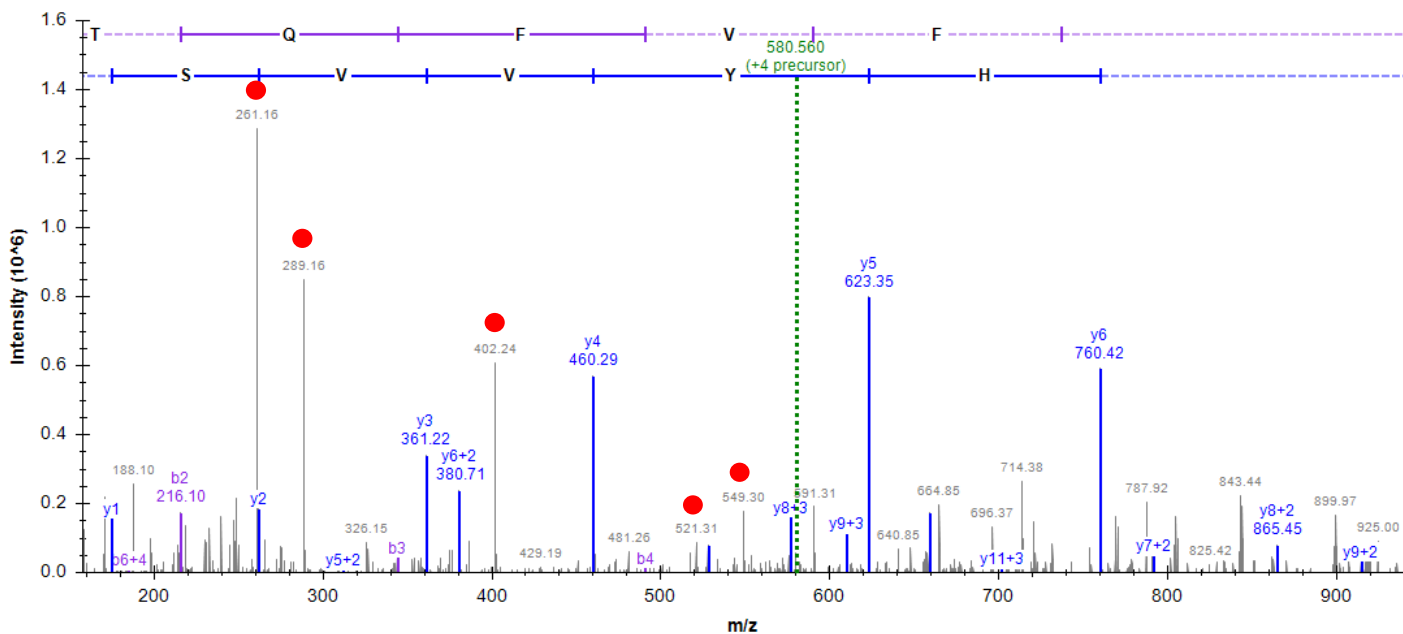

Supplemental Figure 3.



B

GSTO1: <sup>30</sup>F C[719]PFAER<sup>36</sup>

MS1

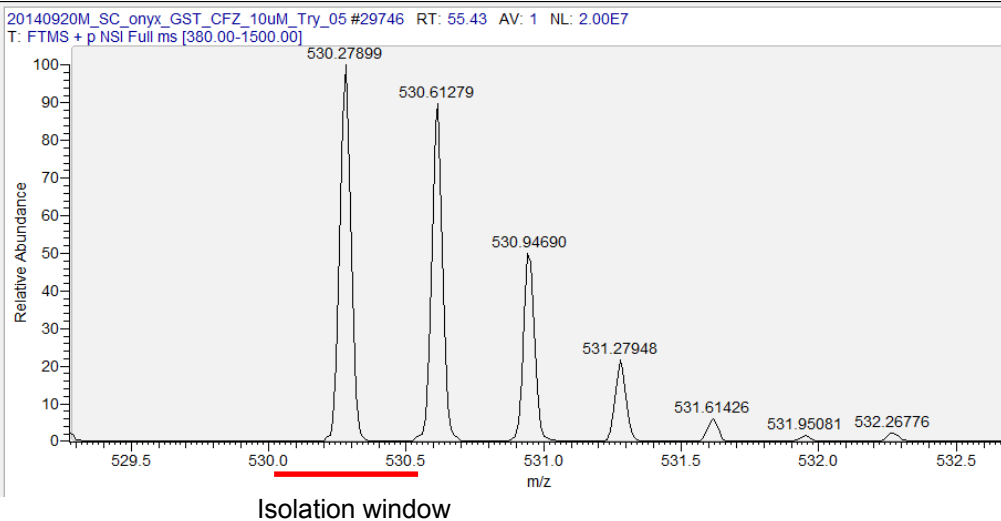

Precursor mass error:  
1.39ppm

Evidence of adduct: CFZ  
fragment ions (red circles)  
and mass shifted b2 ion

MS2

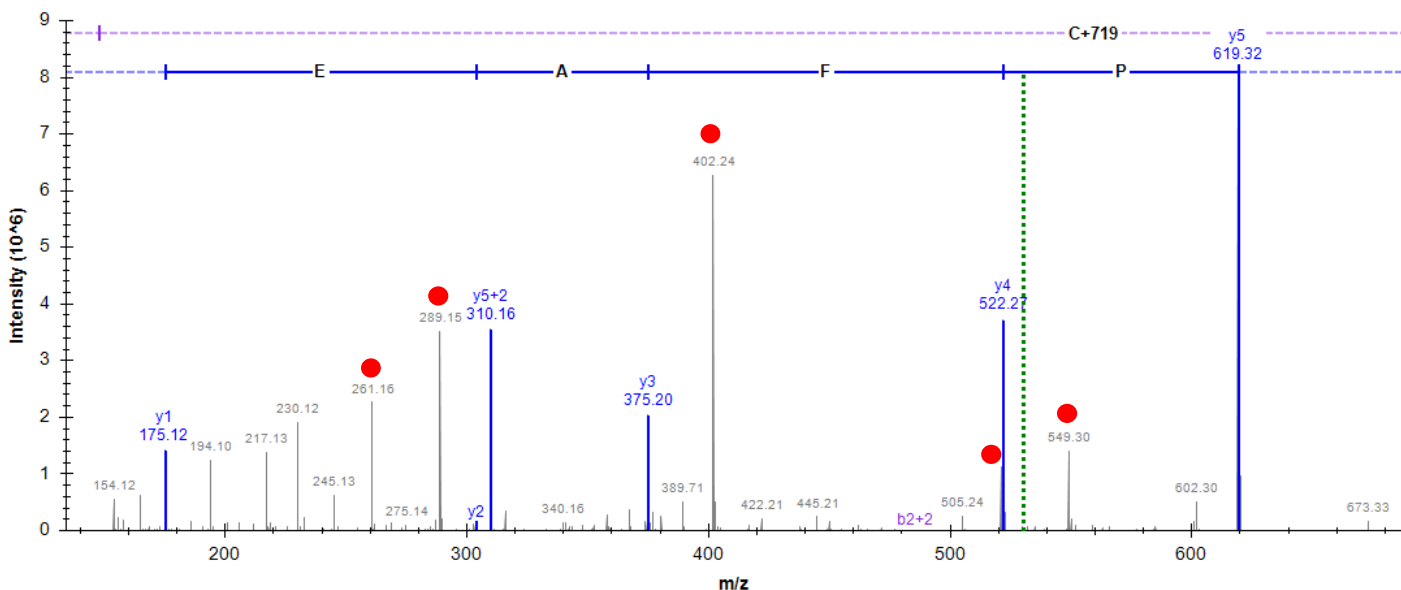

Supplemental Figure 3.

B

GSTO1: <sup>188</sup>LNEC[719]VDHTPK<sup>197</sup>

MS1

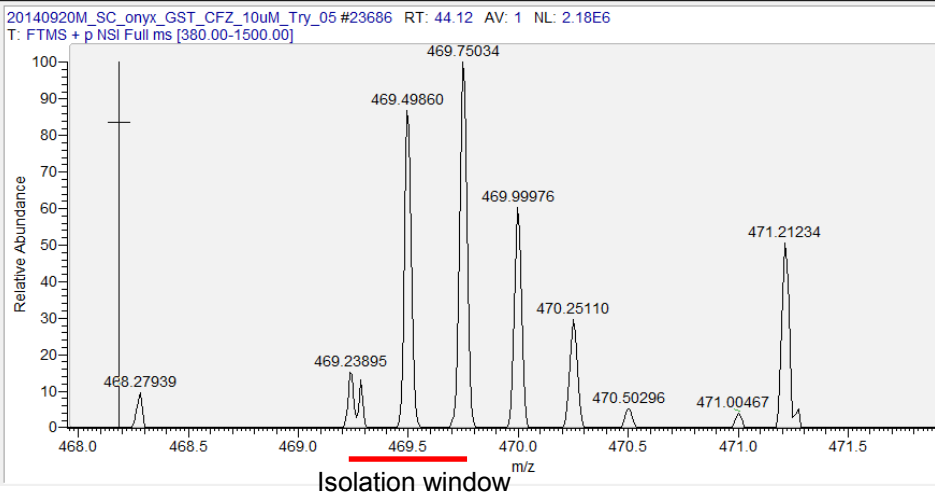

Precursor mass error:  
3.24ppm

Evidence of adduct: CFZ  
fragment ions (red circles)  
and mass shifted y7 ions

MS2

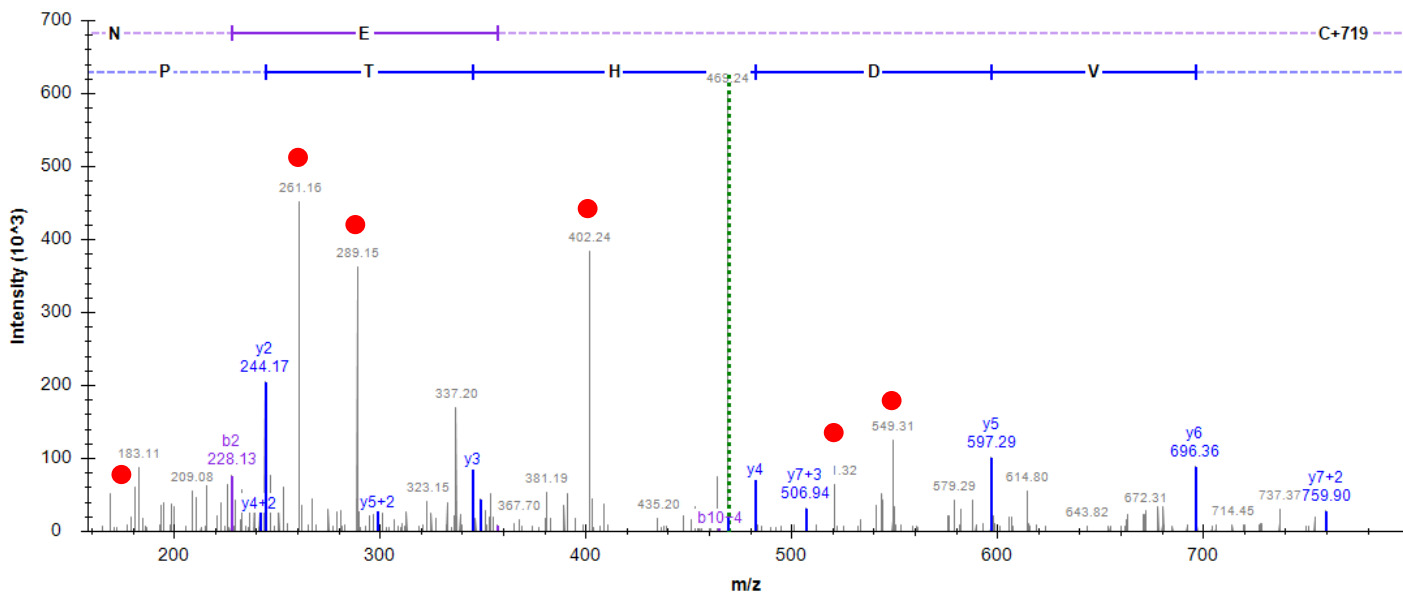

Supplemental Figure 3.

A

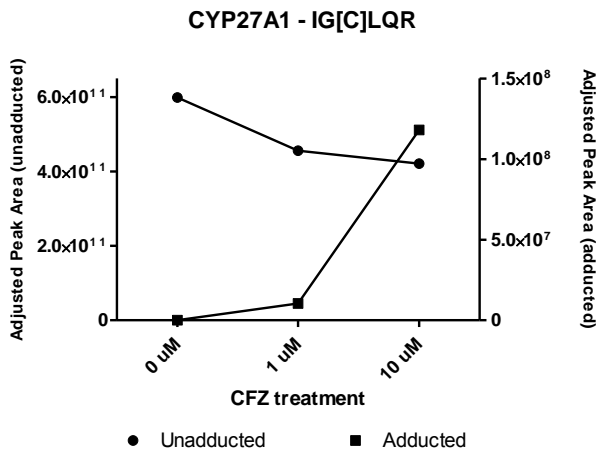

B

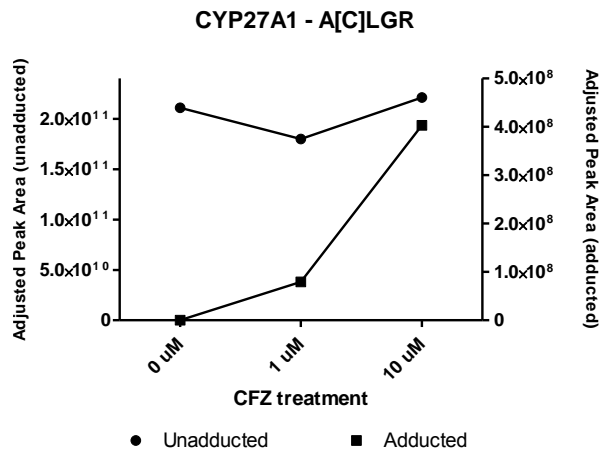

C

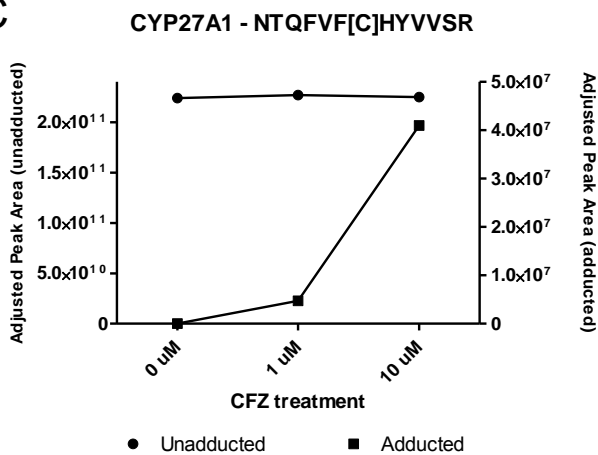

D

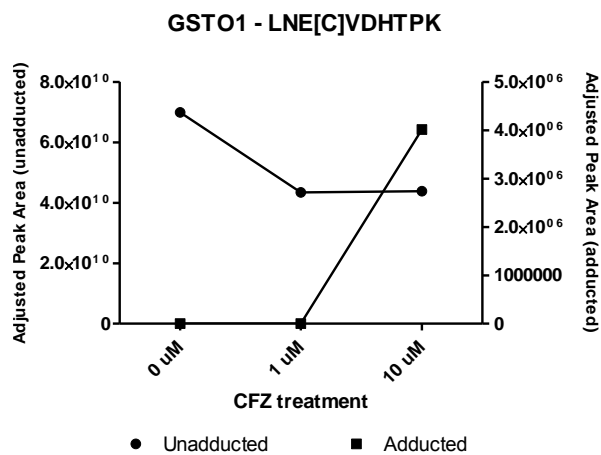

E

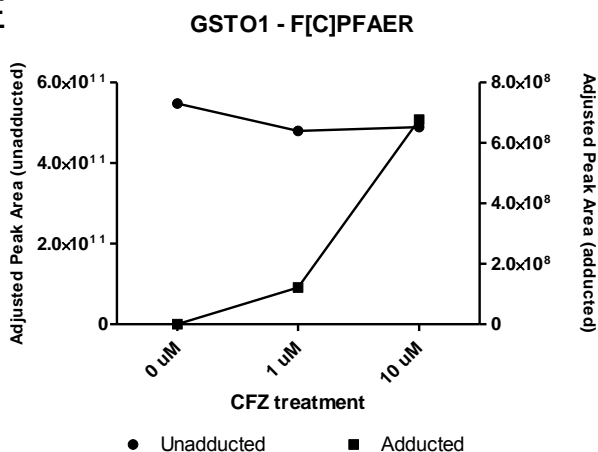

F

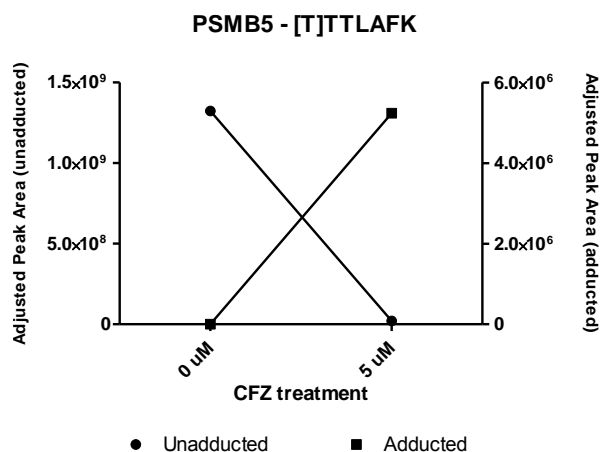

Supplemental Figure 4. Comparison of adducted and unadducted peptide forms. (A-C) CYP27A1 peptides and (D-E) GSTO1 peptides show minimal decreases in the amount of unadducted peptide compared to the target CFZ protein (F) PSMB5.
